# Supplementary material for: Mechanosensitivity is an essential component of phototransduction in vertebrate rods
Source: PubMed Central journal article supplement (PMC7384764; doi:10.1371/journal.pbio.3000750), 2020-07-15

Marker

Retina

Empty

ROS

130

100

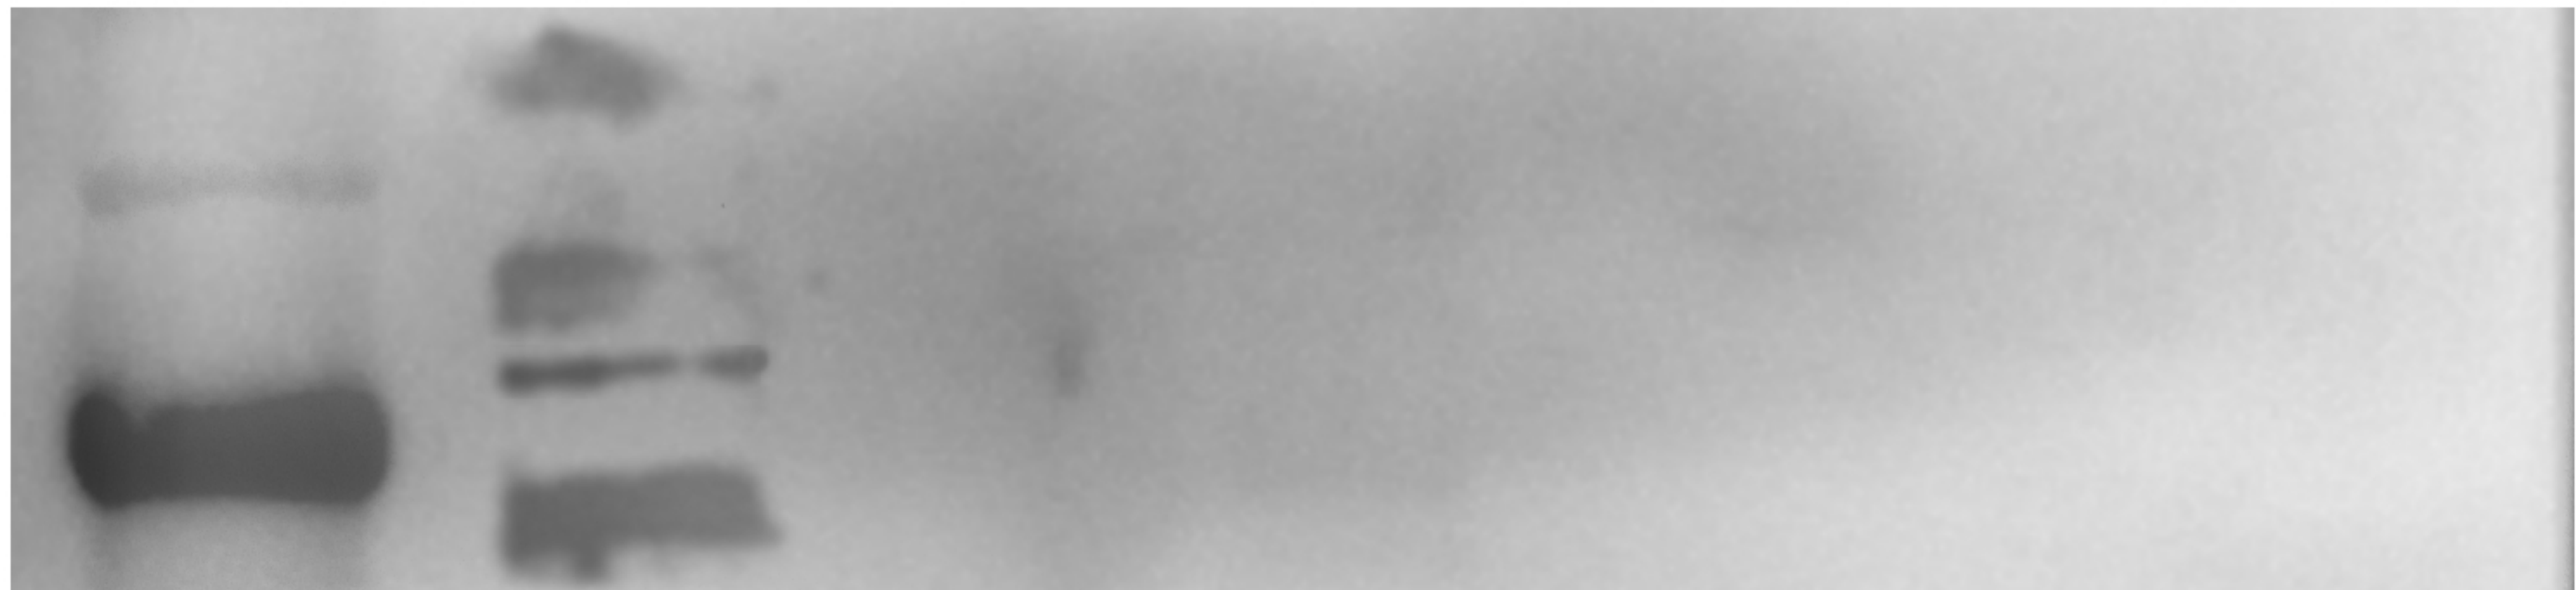

Supplement: pbio.3000750.s016.pdf [file pbio.3000750.s016.pdf]
