# Supplementary material for: Mechanosensitivity is an essential component of phototransduction in vertebrate rods
Source: PLoS Biol. 2020 Jul 15;18(7):e3000750. doi: 10.1371/journal.pbio.3000750 (PMC7384764; doi:10.1371/journal.pbio.3000750)
Supplement: S2 Data — (CSV) [file pbio.3000750.s011.csv]

IS	OS
30,2	36,4
34,5	38,0
42,0	43,0
40,0	32,0
28,0	20,0
54,8	48,5
19,0	18,0
32,3	29,8
